# Supplementary material for: Macrophage-derived insulin-like growth factor-1 is a key neurotrophic and nerve-sensitizing factor in pain associated with endometriosis
Source: PubMed Central journal article supplement (PMC6766660; doi:10.1096/fj.201900797r), 2019-07-10

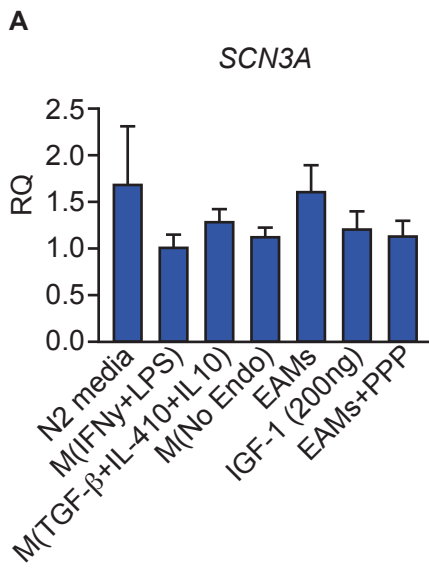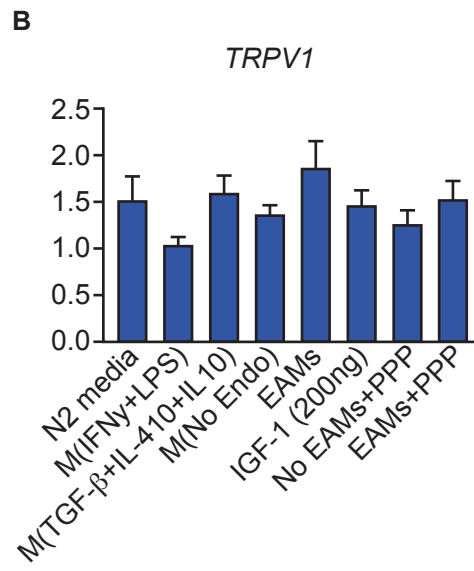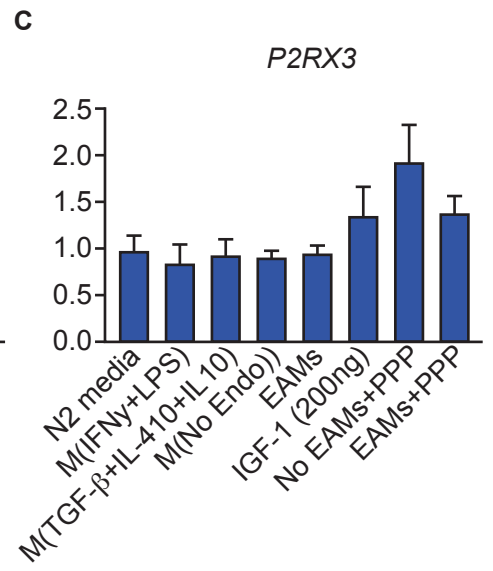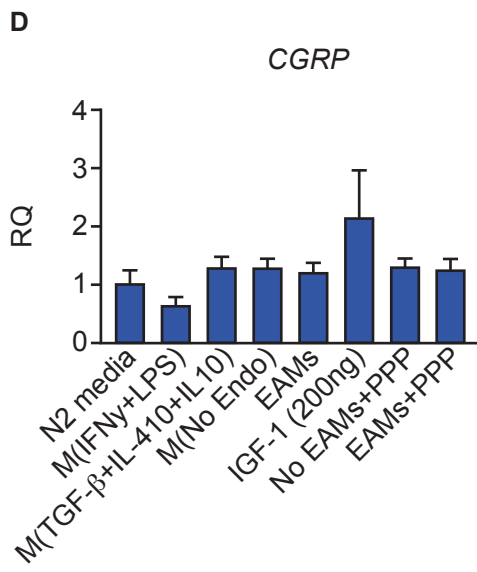

Supplement: fj.201900797R.sf3.pdf [file fj.201900797R.sf3.pdf]
